# Supplementary material for: Causal evidence for lateral prefrontal cortex dynamics supporting cognitive control
Source: eLife journal article supplement (doi:10.7554/elife.28040), 2017-09-13
Supplement: supp [file elife-28040-supp-v1.zip]

Archive with 9 entries (9 files):
- elife_poa_e28040_Figure_2_figure_supplement_2.pdf
- elife_poa_e28040_Figure_2_figure_supplement_2.pdf
- elife_poa_e28040_Figure_4_figure_supplement_2.pdf
- elife_poa_e28040_Figure_2_figure_supplement_5.pdf
- elife_poa_e28040_Transparent_Reporting_File.pdf
- elife_poa_e28040_Figure_2_figure_supplement_4.pdf
- elife_poa_e28040_Figure_4_figure_supplement_1.pdf
- elife_poa_e28040_Figure_2_figure_supplement_3.pdf
- elife_poa_e28040_Figure_3_figure_supplement_1.pdf
