# Supplementary material for: Causal evidence for lateral prefrontal cortex dynamics supporting cognitive control
Source: eLife journal article supplement (doi:10.7554/elife.28040), 2017-09-13
Supplement: supp [file elife-28040-supp-v1.zip]

**A**

Spatial Impairment (ER)

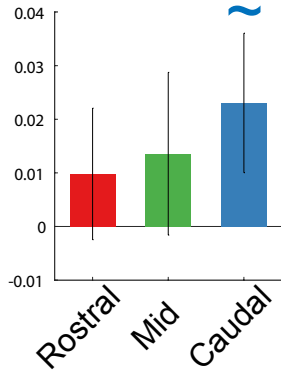**B**

Verbal Contextual Control

Impairment (RT)

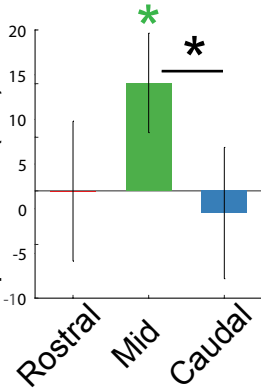**C**

Temporal Control

Impairment (ER)

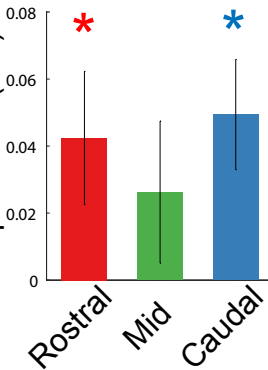**D**

Contextual Control

Impairment (ER)

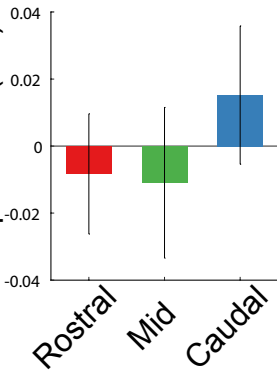

cTBS Target
