# Supplementary figures and images for: Causal evidence for lateral prefrontal cortex dynamics supporting cognitive control
Source: eLife journal article supplement (doi:10.7554/elife.28040), 2017-09-13

# Original

# Replication

A

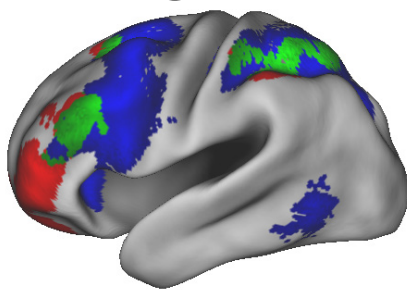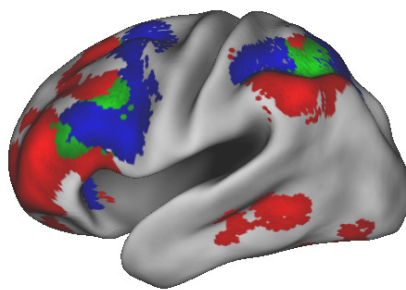

B

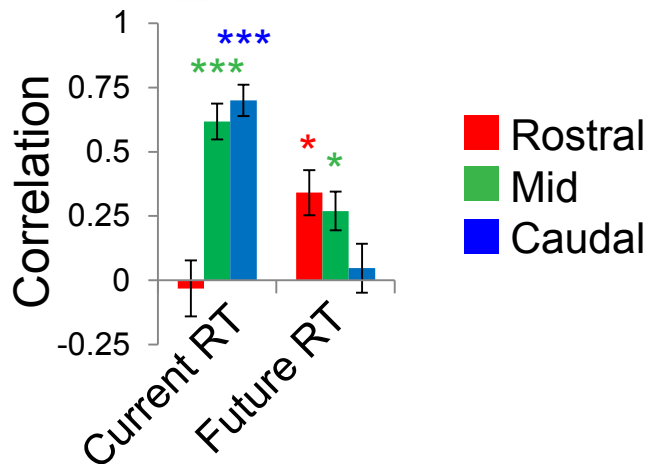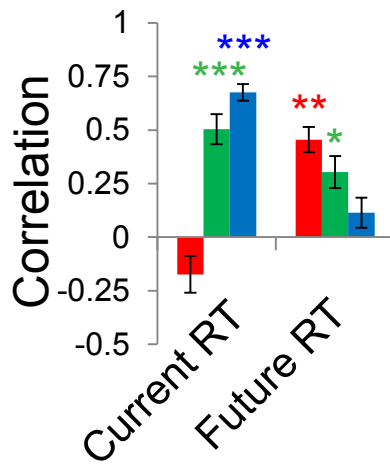

C

BOLD Activity (A.U.)

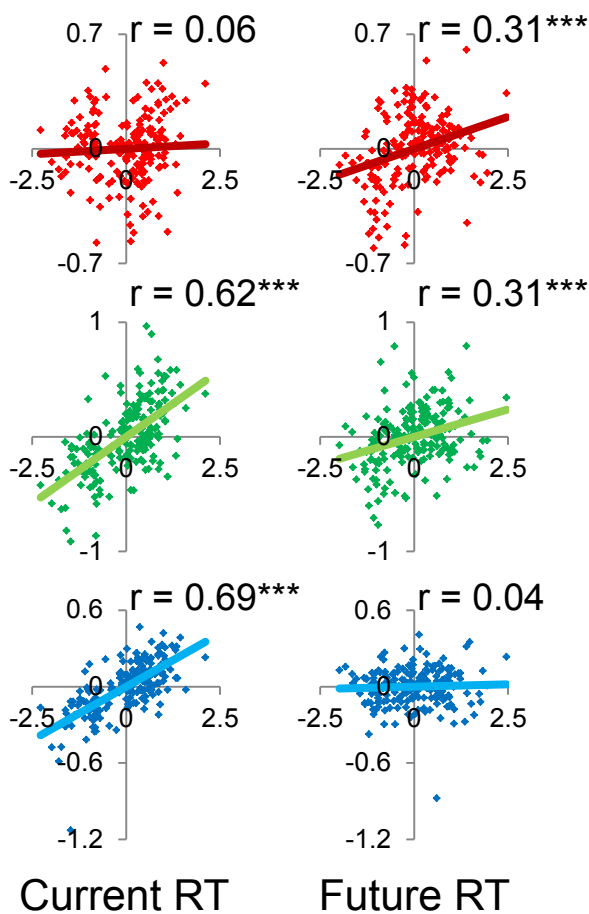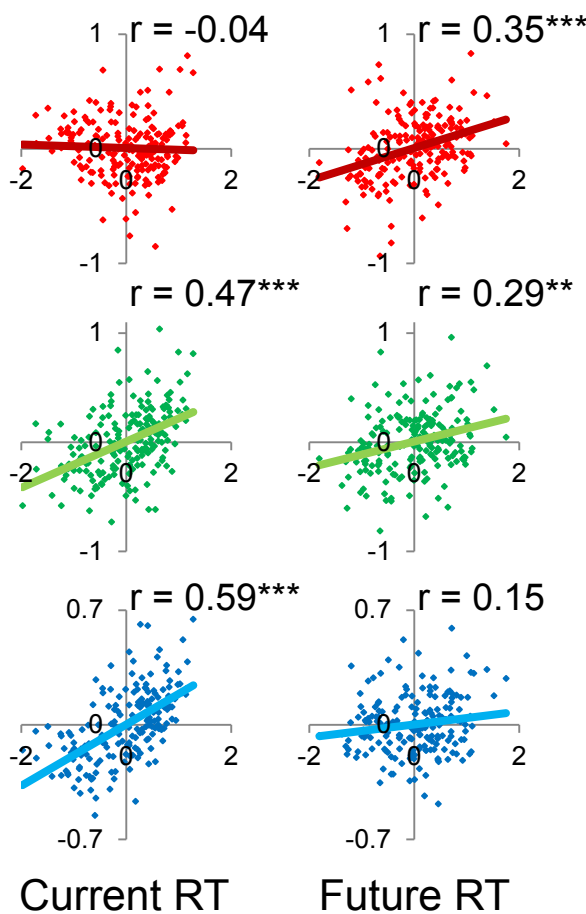

Supplement: supp [file elife-28040-supp-v1.zip]

# Hierarchical Strength

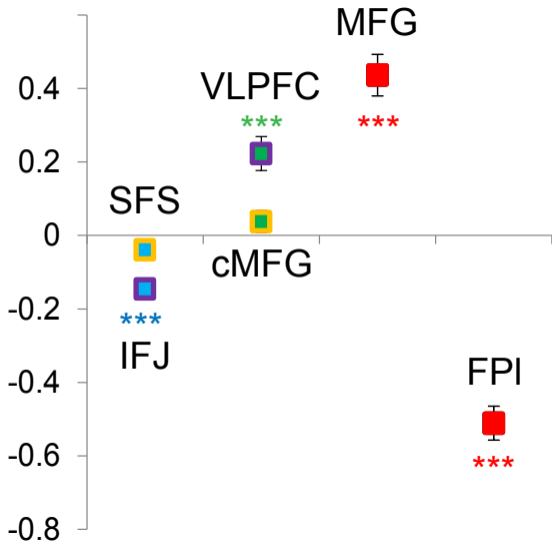

Supplement: supp [file elife-28040-supp-v1.zip]

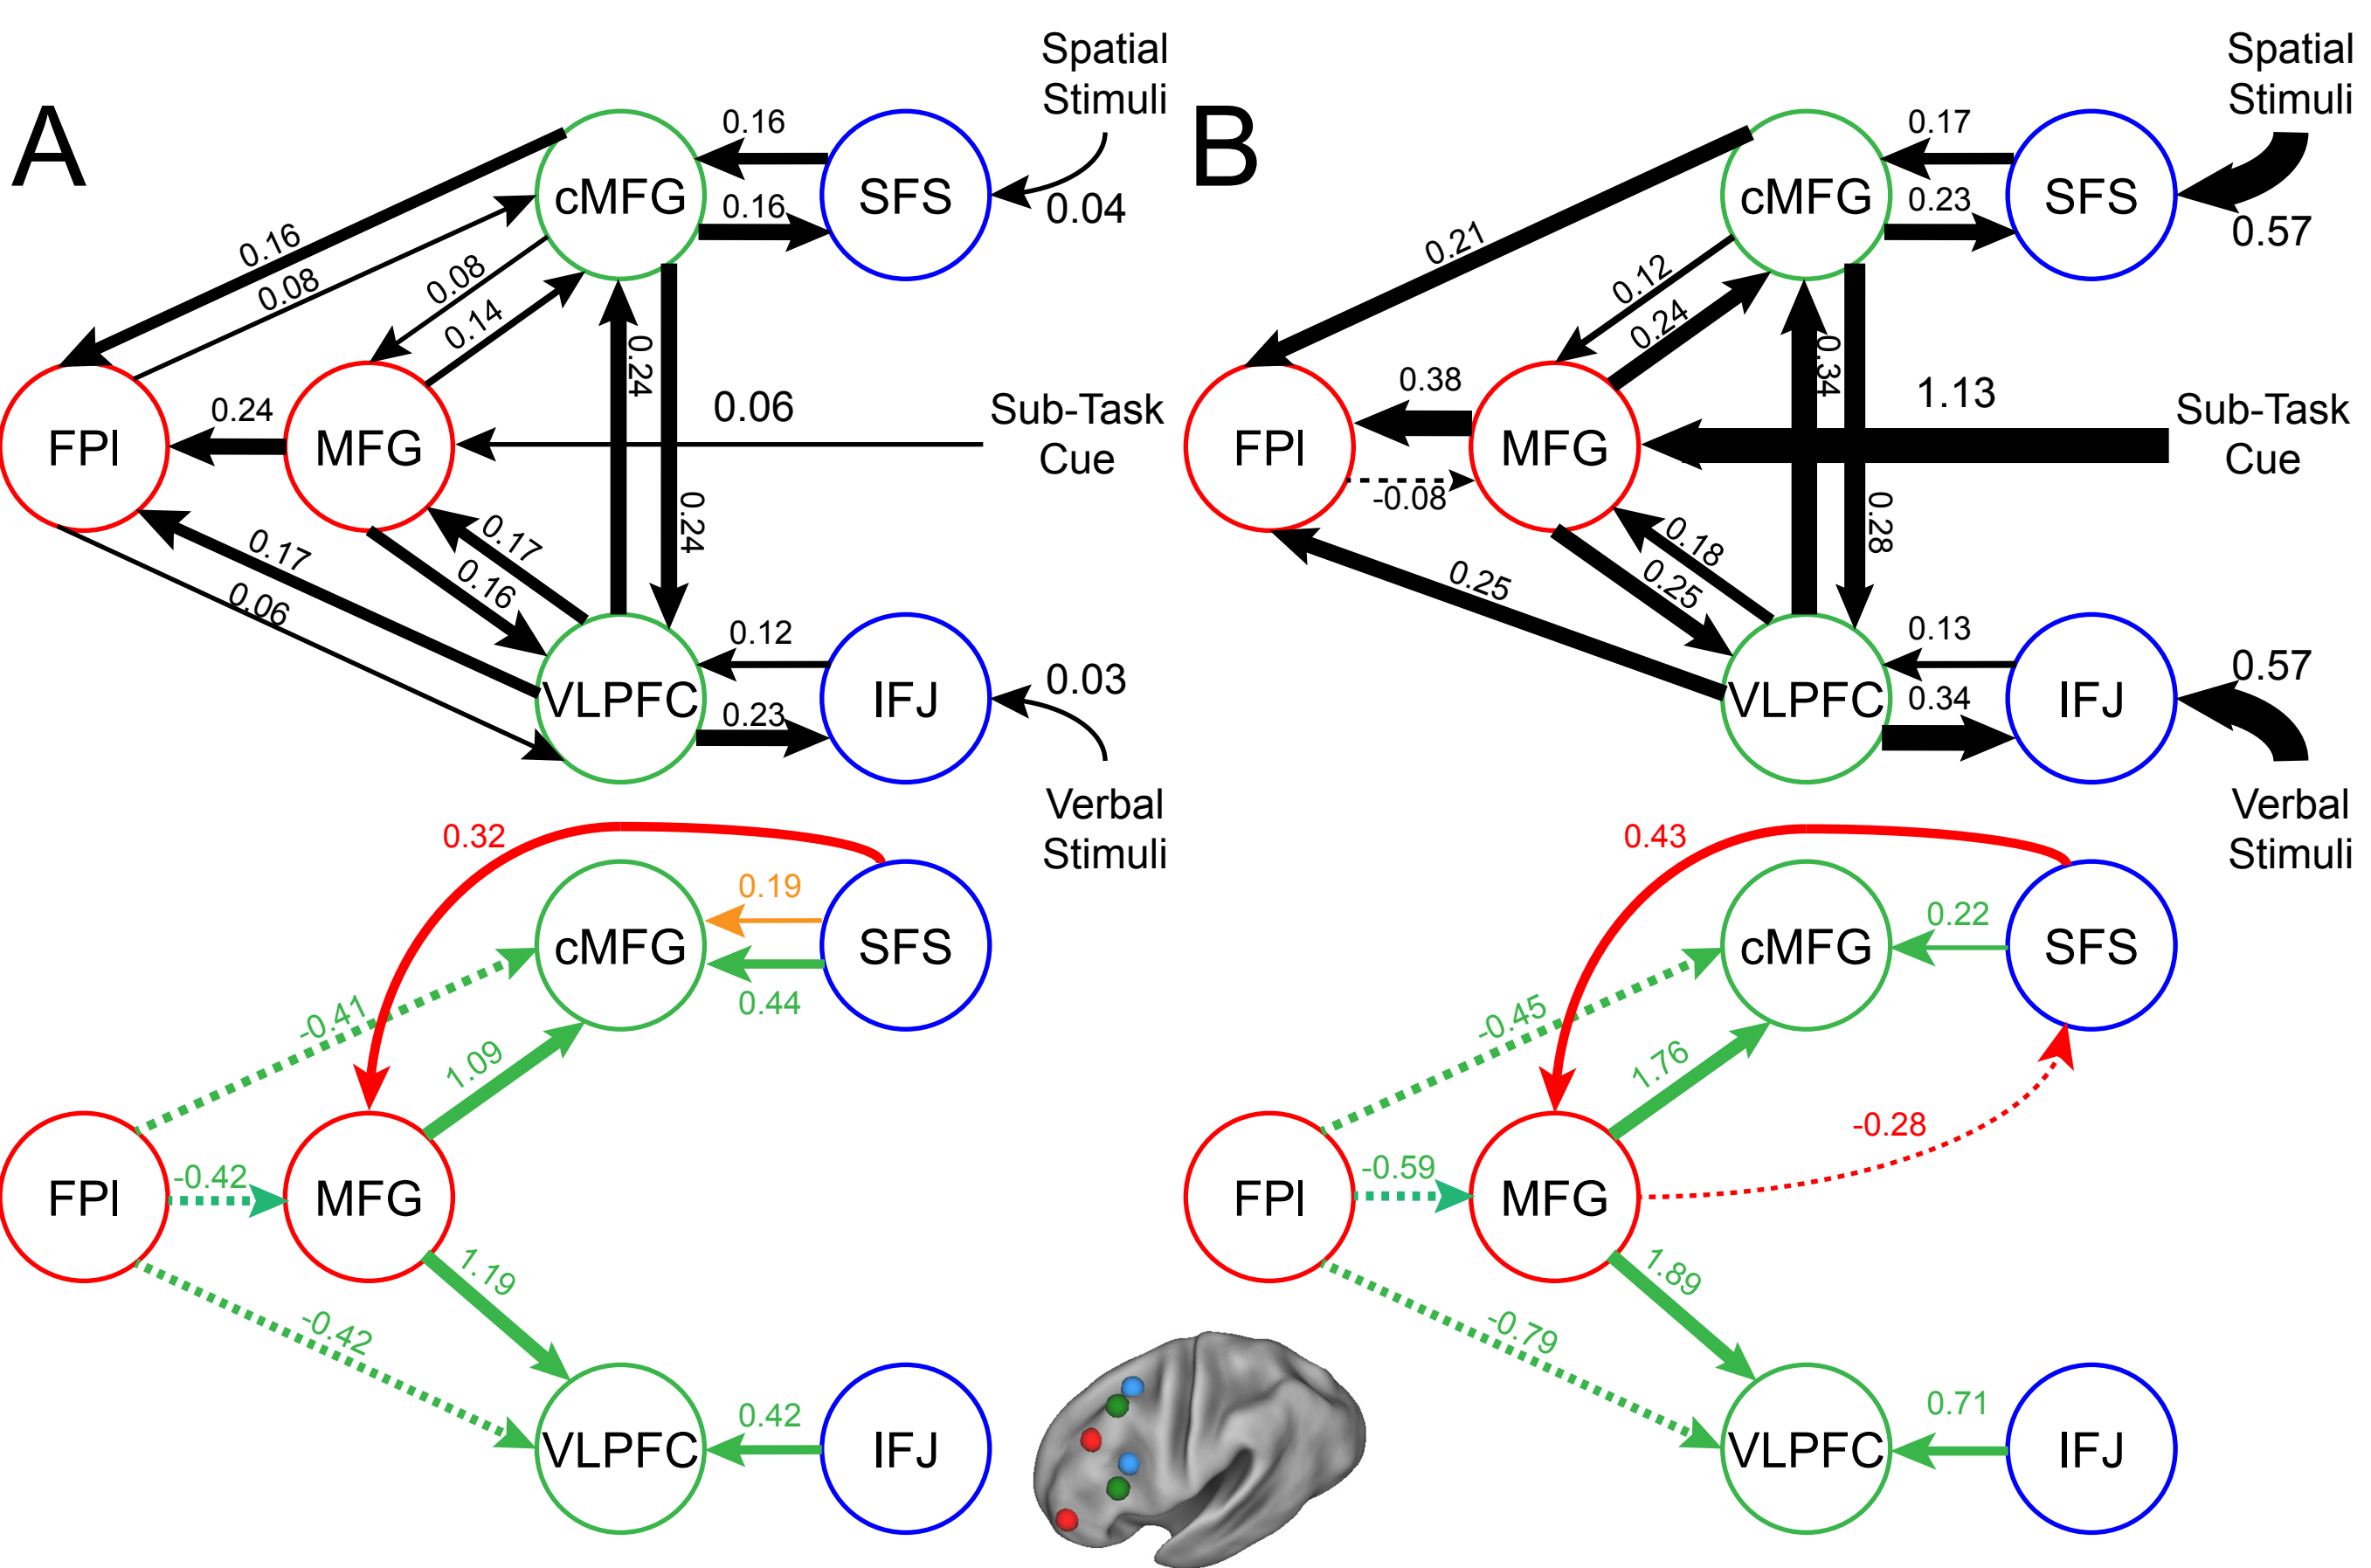

Supplement: supp [file elife-28040-supp-v1.zip]

# Original

# Replication

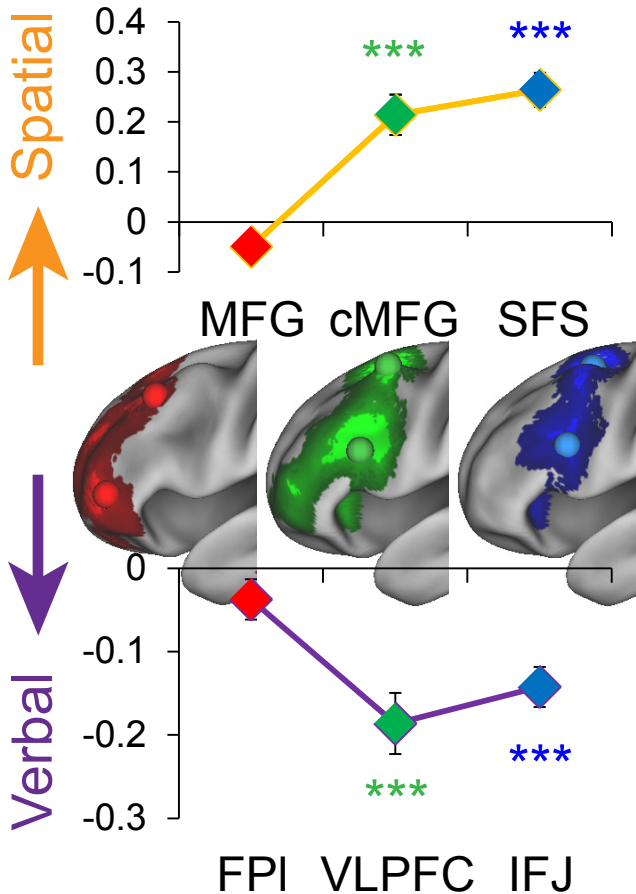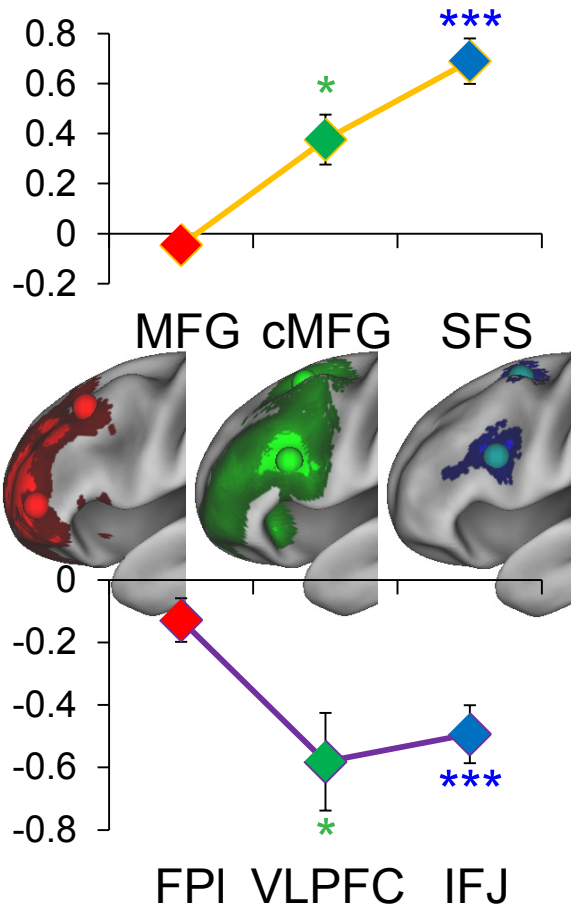

Supplement: supp [file elife-28040-supp-v1.zip › elife_poa_e28040_Figure_2_figure_supplement_2.pdf]

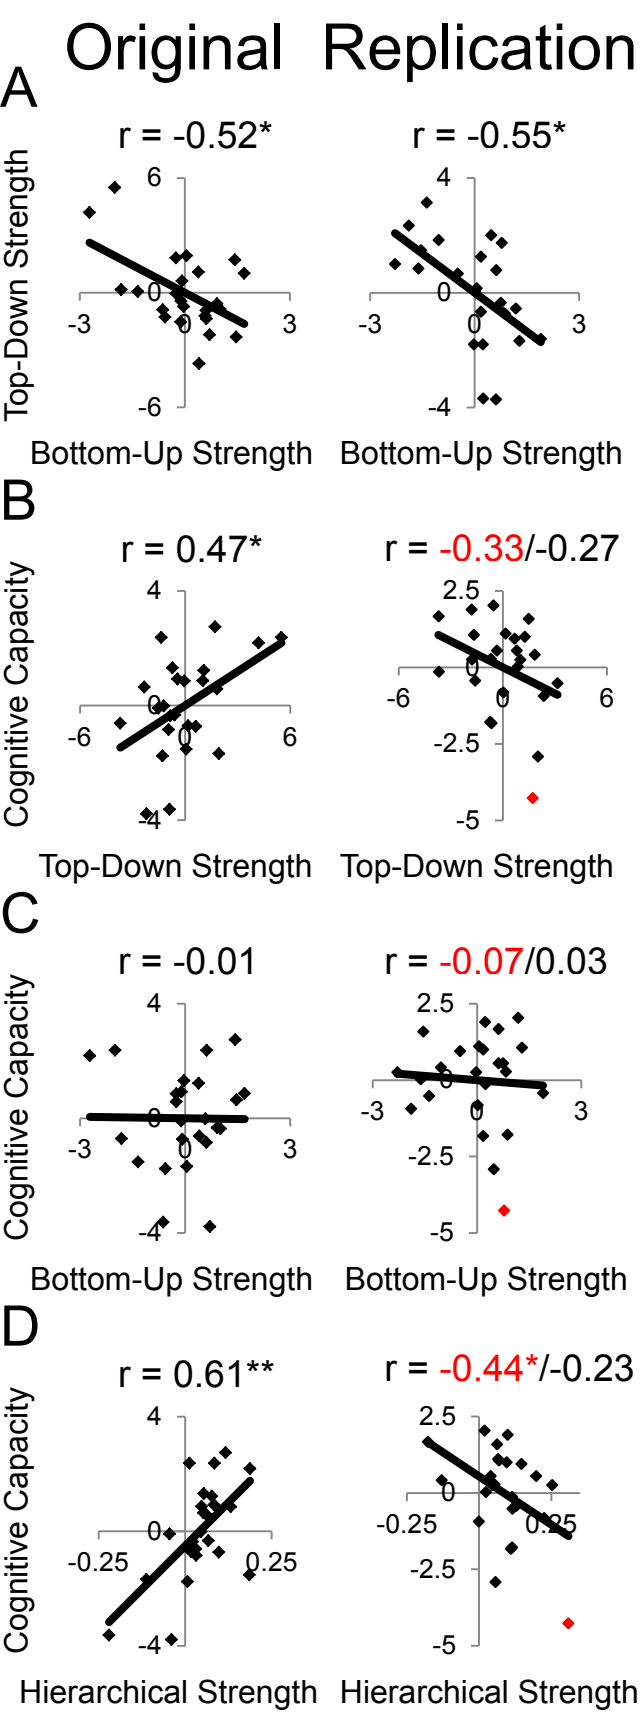

Supplement: supp [file elife-28040-supp-v1.zip › elife_poa_e28040_Figure_2_figure_supplement_5.pdf]

# Original

Hierarchical Strength

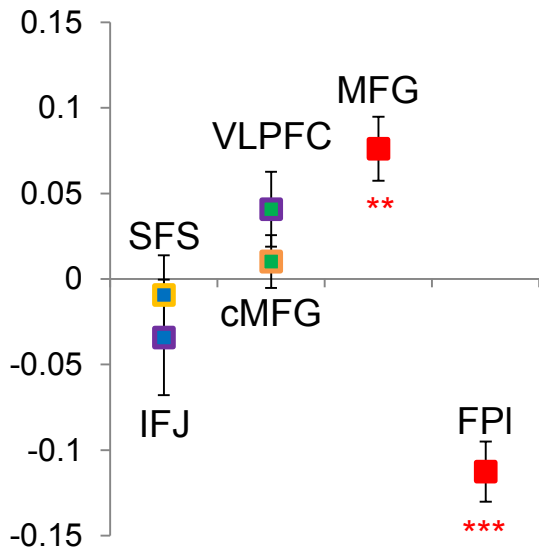

# Replication

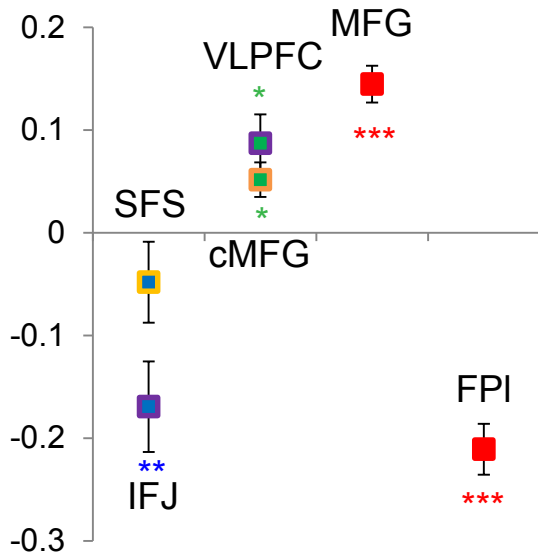

Supplement: supp [file elife-28040-supp-v1.zip › elife_poa_e28040_Figure_2_figure_supplement_4.pdf]

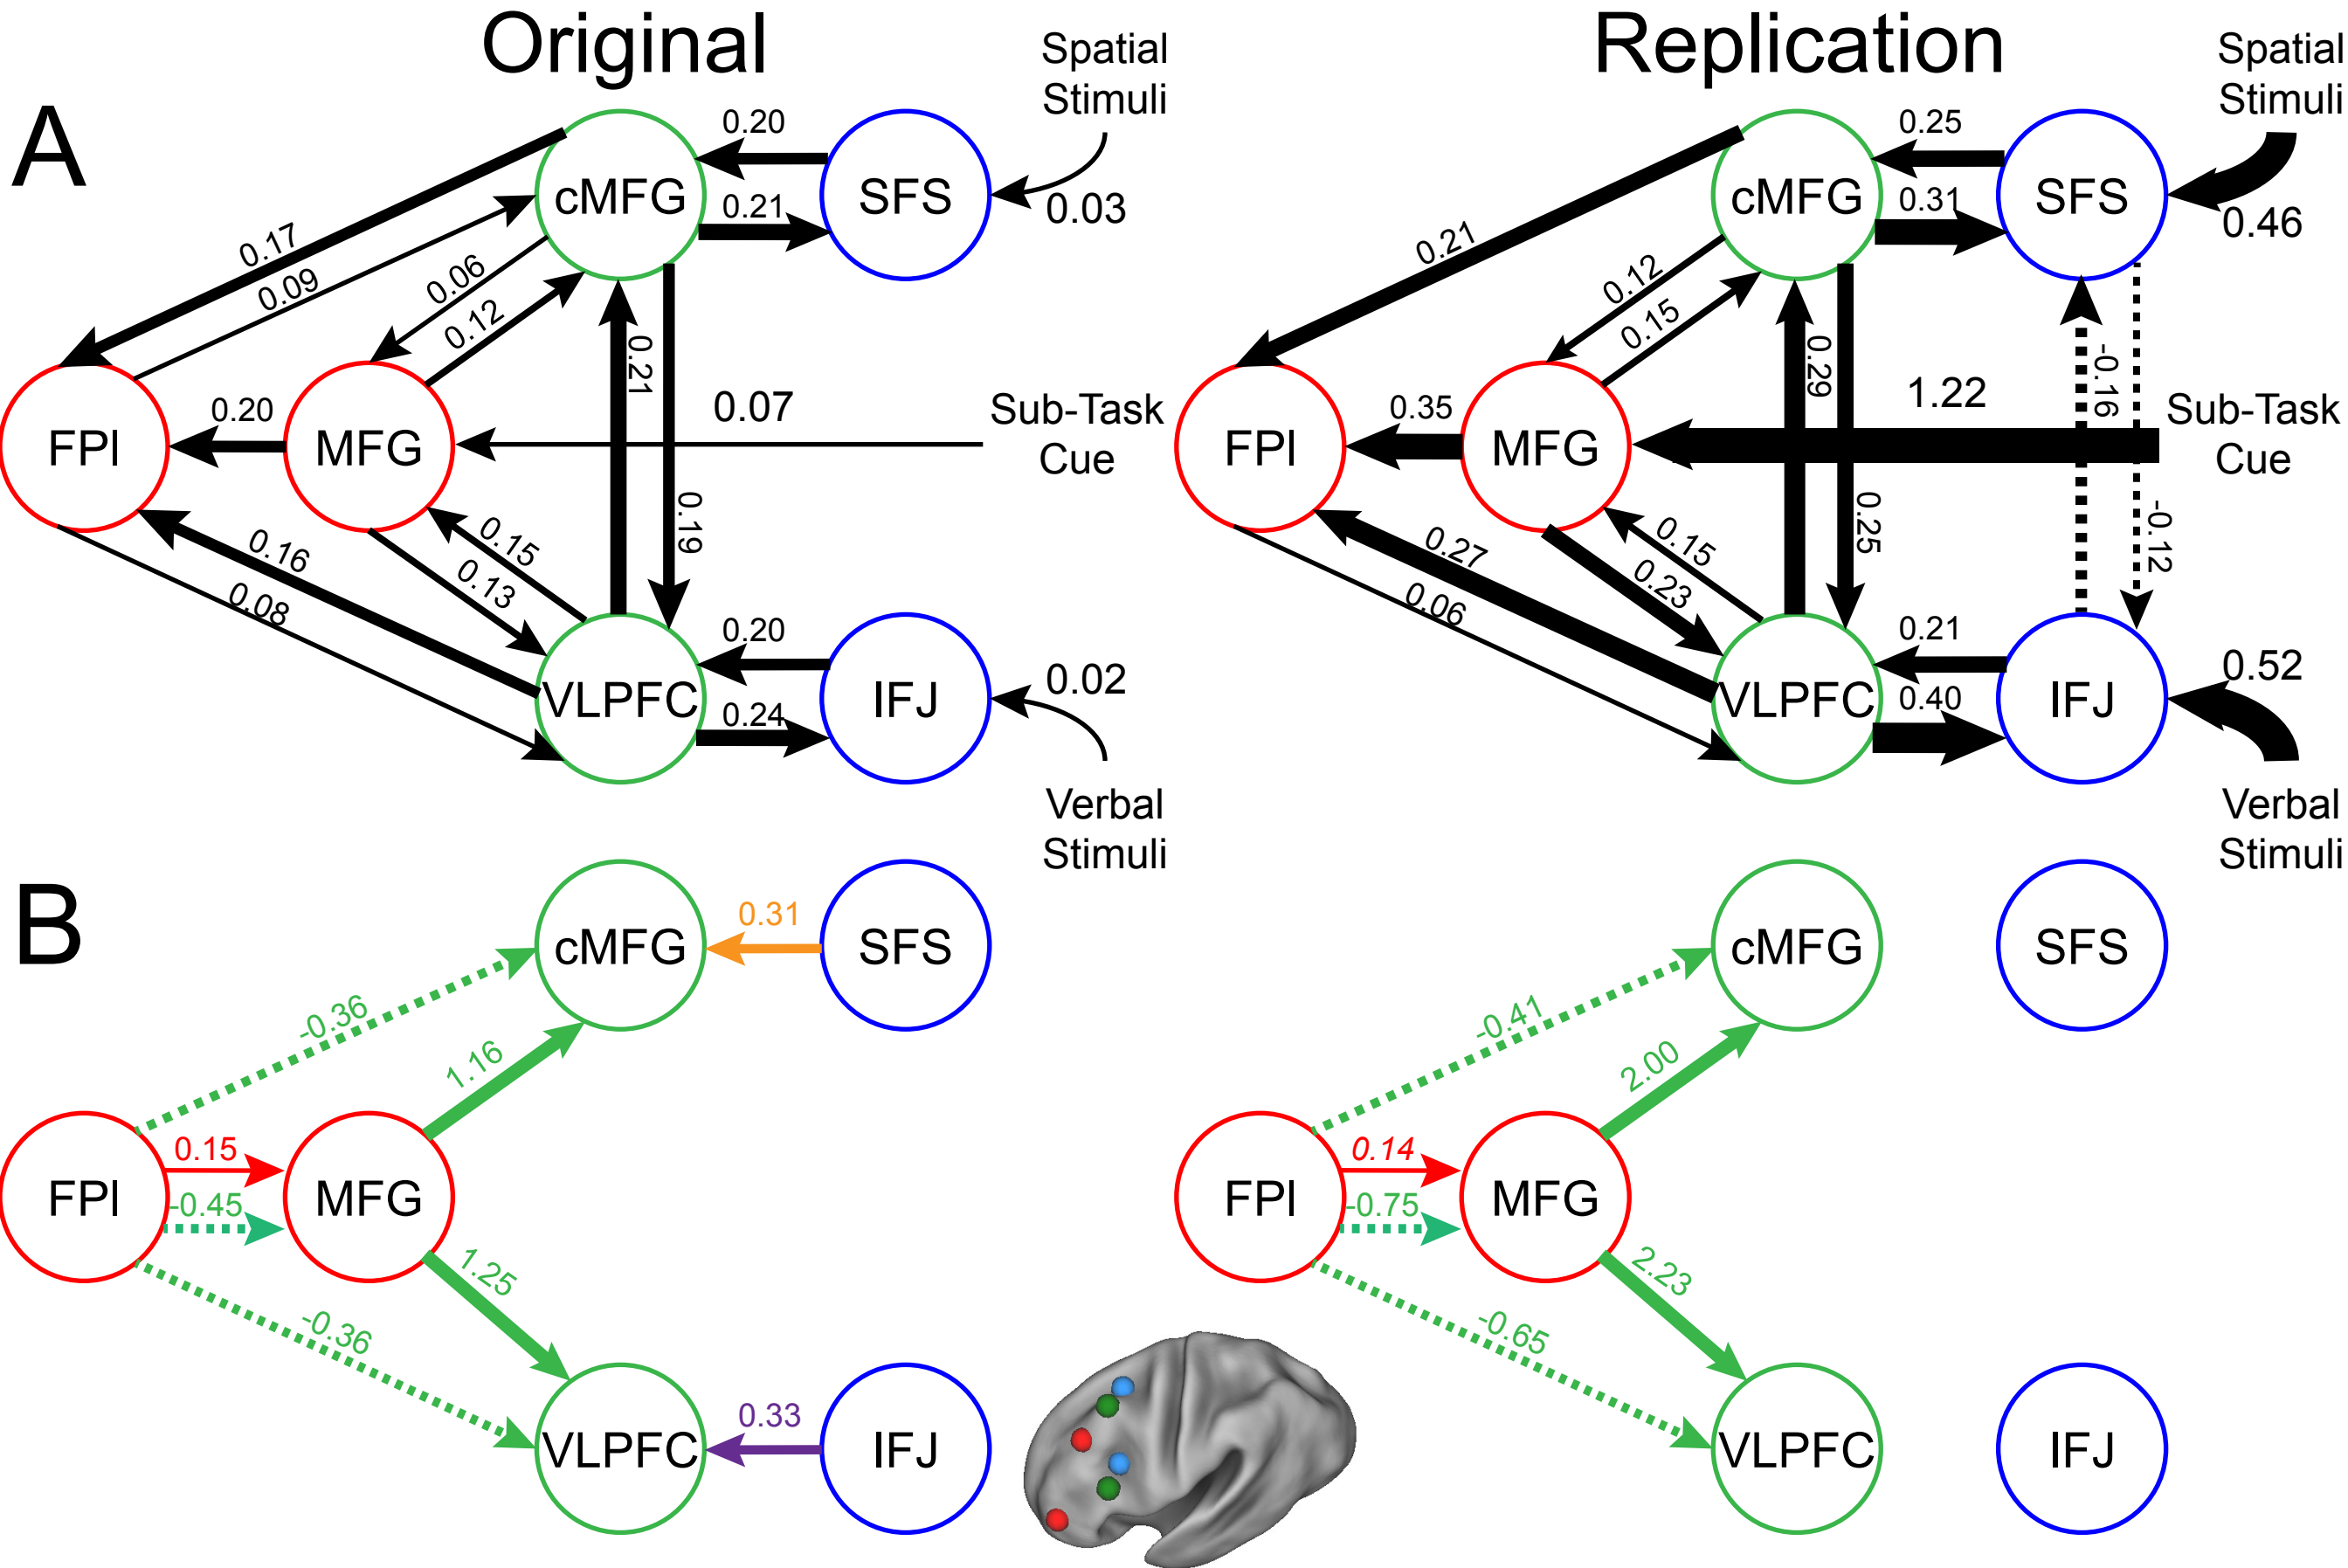

Supplement: supp [file elife-28040-supp-v1.zip › elife_poa_e28040_Figure_2_figure_supplement_3.pdf]
